# Supplementary material for: The effect of the halogen on the structural, optoelectronic, and luminescent properties of hybrid (1,5-pentanediamine)PbX4 (X = Cl, Br, I) perovskites
Source: Royal Society of Chemistry journal article supplement (doi:10.1039/d3tc02767h), 2023-11-27
Supplement: d3tc02767h1.pdf [file d3tc02767h1.pdf]

## The effect of halogen on the structural, optoelectronic, and luminescent properties of hybrid (1,5-Pentanediamine)PbX<sub>4</sub> (X=Cl, Br, I) perovskites

D.S. Shtarev<sup>1,2a,\*</sup>, M.I. Balanov<sup>2,b</sup>, A.Ju. Major<sup>2,3,c</sup>, A.V. Gerasimenko<sup>4,d</sup>, R. Kevorkyants<sup>5,e</sup>, D.A. Zharovov<sup>5,f</sup>, K.M. Bulanin<sup>6,g</sup>, D.V. Pankin<sup>6,7,h</sup>, A.V. Rudakova<sup>6,i</sup>, D.A. Chaplygina<sup>2,j</sup>, N.I. Selivanov<sup>5,k</sup>, A.V. Emeline<sup>5,l</sup>

<sup>1</sup> Department of Materials Science, Shenzhen MSU-BIT University, PRC.

<sup>2</sup> Institute of High Technologies and Advanced Materials of the Far Eastern Federal University, Vladivostok, Russky Island, Ajax, 10, 690022, Russian Federation.

<sup>3</sup> Institute of Automation and Control Processes, Far Eastern Branch, Russian Academy of Sciences, Russian Federation.

<sup>4</sup> Institute of Chemistry, Far Eastern Branch, Russian Academy of Sciences, Russian Federation.

<sup>5</sup> Saint-Petersburg State University, Laboratory 'Photoactive Nanocomposite Materials', Russian Federation.

<sup>6</sup> Saint-Petersburg State University, Laboratory 'Photonics of Crystals', Russian Federation.

<sup>7</sup> Saint-Petersburg State University, Center for Optical and Laser Materials Research, Russian Federation.

<sup>a</sup> shtarev@mail.ru, <sup>b</sup> balanov.mi@dvfur.ru, <sup>c</sup> mayor@iacp.dvo.ru, <sup>d</sup> gerasimenko@ich.dvo.ru,

<sup>e</sup> ruslan.kevorkyants@gmail.com, <sup>f</sup> dmzharovov@gmail.com, <sup>g</sup> k.bulanin@spbu.ru,

<sup>h</sup> dmitrii.pankin@spbu.ru, <sup>i</sup> aida.rudakova@spbu.ru, <sup>j</sup> chaplygina.dal@dvfur.ru,

<sup>k</sup> selivanov\_chem@mail.ru, <sup>l</sup> alexei.emeline@spbu.ru

\* - Corresponding author (ORCID: 0000-0002-1274-0183)

### Supplementary materials

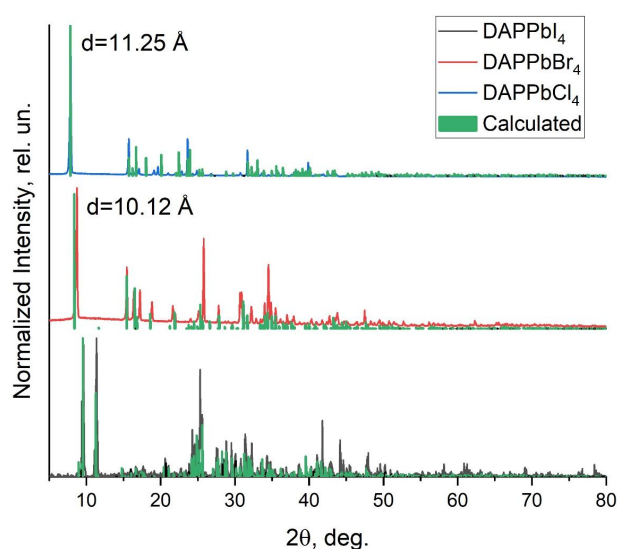

Figure S1. Powder XRD spectra of DAPPbX<sub>4</sub> (X = Cl, Br, I) and the reference XRD spectrum of DAPPbI<sub>4</sub>.

Table S1. Selected crystal and refinement data for DAPPbX<sub>4</sub>, (X = Cl, Br).

|                                                                                                  | DAPPbCl <sub>4</sub>                                                              | DAPPbBr <sub>4</sub>                                                              |
|--------------------------------------------------------------------------------------------------|-----------------------------------------------------------------------------------|-----------------------------------------------------------------------------------|
| Formula                                                                                          | NH <sub>3</sub> (CH <sub>2</sub> ) <sub>5</sub> NH <sub>3</sub> PbCl <sub>4</sub> | NH <sub>3</sub> (CH <sub>2</sub> ) <sub>5</sub> NH <sub>3</sub> PbBr <sub>4</sub> |
| Formula weight                                                                                   | 453.19                                                                            | 631.03                                                                            |
| Temperature, K                                                                                   | 100(2)                                                                            | 150(2)                                                                            |
| Radiation type                                                                                   | Mo K $\alpha$                                                                     | Mo K $\alpha$                                                                     |
| Space group                                                                                      | C2221                                                                             | C2/c                                                                              |
| Shape / size, mm                                                                                 | Prism / 0.037 $\square$ 0.13 $\square$ 0.16                                       | Prism / 0.15 $\square$ 0.20 $\square$ 0.24                                        |
| <b>a</b> , Å                                                                                     | 7.4322(6)                                                                         | 21.4488(11)                                                                       |
| <b>b</b> , Å                                                                                     | 8.0456(6)                                                                         | 8.1241(4)                                                                         |
| <b>c</b> , Å                                                                                     | 22.5432(18)                                                                       | 8.2662(4)                                                                         |
| $\beta$ , °                                                                                      |                                                                                   | 100.820(3)                                                                        |
| V, Å <sup>3</sup> / Formulae unit                                                                | 1348.00(18) / 4                                                                   | 1414.80(12) / 4                                                                   |
| D <sub>calc</sub> (g/cm <sup>3</sup> ) / $\mu$ (mm <sup>-1</sup> )                               | 2.233 / 13.270                                                                    | 2.963 / 23.185                                                                    |
| $\square$ $\theta$ range (°)                                                                     | 3.62 – 28.50                                                                      | 1.933 – 26.086                                                                    |
| Range of <i>h</i> , <i>k</i> and <i>l</i>                                                        | –6/9, –10/10, –30/30                                                              | –26/26, –10/10, –10/10                                                            |
| F(000)                                                                                           | 840                                                                               | 1128                                                                              |
| Refl. [meas./uniq./ <i>I</i> >2 $\sigma$ ( <i>I</i> )]                                           | 6297/1718/1700 (R <sub>int</sub> = 0.0211)                                        | 23026/1409/1243 (R <sub>int</sub> = 0.0478)                                       |
| Number of parameters                                                                             | 108                                                                               | 108                                                                               |
| Goof                                                                                             | 1.068                                                                             | 1.142                                                                             |
| R <sub>1</sub> , wR <sub>2</sub> [ <i>F</i> <sup>2</sup> > 2 $\sigma$ ( <i>F</i> <sup>2</sup> )] | 0.0176, 0.0437                                                                    | 0.0231, 0.0540                                                                    |
| R <sub>1</sub> , wR <sub>2</sub> (all data)                                                      | 0.0179, 0.0439                                                                    | 0.0294, 0.0560                                                                    |
| $\Delta\rho_{\min}$ , $\Delta\rho_{\max}$ (e/Å <sup>3</sup> )                                    | –0.469, 4.515                                                                     | a–1.047, 1.894                                                                    |
| Deposit number CCDC                                                                              | 2269541                                                                           | 2269539                                                                           |

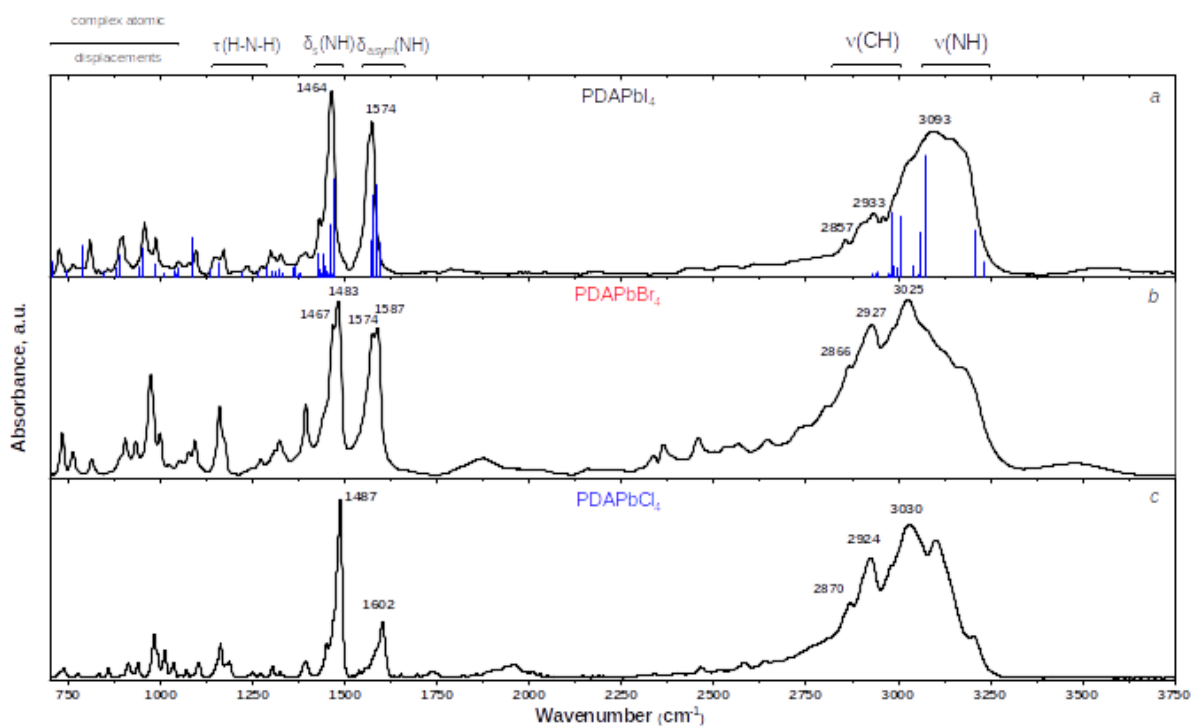

Figure S2. FTIR spectra of *a* – PDAPbI<sub>4</sub>, *b* – PDAPbBr<sub>4</sub>, *c* – PDAPbCl<sub>4</sub>. The calculated IR spectrum of PDAPbI<sub>4</sub> is represented by the blue bars.

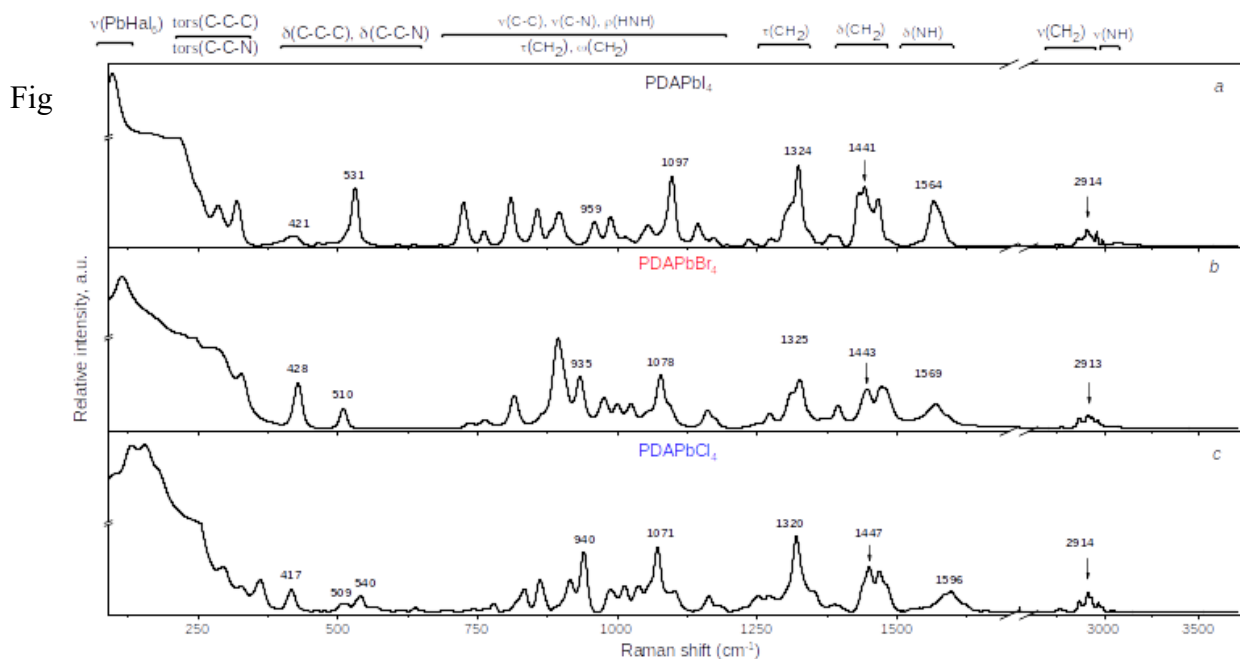

Figure S3. Raman spectra of *a* – PDAPbI<sub>4</sub>, *b* – PDAPbBr<sub>4</sub>, *c* – PDAPbCl<sub>4</sub>.

Table S2. Frequencies and assignment of the selected characteristic Raman and IR peaks in the range [95-1600] cm<sup>-1</sup>.

| PDAPbCl <sub>4</sub> |      | PDAPbBr <sub>4</sub> |      | PDAPbI <sub>4</sub> |      |                   | Assignment                                        |
|----------------------|------|----------------------|------|---------------------|------|-------------------|---------------------------------------------------|
| Raman                | FTIR | Raman                | FTIR | Raman               | FTIR | FTIR (calculated) |                                                   |
| 1596                 | 1602 | 1592                 | 1587 | 1573                | 1574 | 1584              | δ <sub>asym</sub> (H-N-H)                         |
| 1587                 | 1585 | 1569                 | 1575 | 1564                | 1565 | 1576              | δ <sub>asym</sub> (H-N-H)                         |
| 1482                 | 1487 | 1487                 | 1483 | 1466                | 1464 | 1471              | δ <sub>s</sub> (H-N-H)                            |
| 1467                 | 1468 | 1475                 | 1467 | 1444                | 1448 | 1461<br>1465      | predominantly<br>δ <sub>s</sub> (H-N-H)<br>ν(C-N) |
| 1447                 | 1450 | 1443                 | 1444 | 1441                | 1431 | 1425,             | δ(H-C-H)                                          |

| PDAPbCl <sub>4</sub> |      | PDAPbBr <sub>4</sub> |      | PDAPbI <sub>4</sub> |      |                      | Assignment                                                                                                                                               |
|----------------------|------|----------------------|------|---------------------|------|----------------------|----------------------------------------------------------------------------------------------------------------------------------------------------------|
| Raman                | FTIR | Raman                | FTIR | Raman               | FTIR | FTIR<br>(calculated) |                                                                                                                                                          |
|                      |      |                      |      |                     |      | 1440                 |                                                                                                                                                          |
| 1320                 | n/o  | 1325                 | 1324 | 1324                | 1326 | 1322                 | predominantly<br>$\tau(\text{CH}_2)$                                                                                                                     |
| 1071                 | 1071 | 1078                 | 1076 | 1097                | 1097 | 1087                 | $\nu(\text{C-C})$<br>$\nu(\text{C-N})$<br>$\rho(\text{HNH})$<br>$\omega(\text{CH}_2)$<br>$\tau(\text{CH}_2)$                                             |
| 1037                 | 1036 | 1024                 | 1024 | 1015                | 1015 | 1011                 | complex<br>atomic<br>displacements<br>$\nu(\text{C-C})$<br>$\rho(\text{HNH})$<br>$\tau(\text{CH}_2)$<br>$\nu(\text{C-N})$                                |
| 1012                 | 1012 | 974                  | 974  | 986                 | 986  | 984                  | complex<br>atomic<br>displacements<br>$\nu(\text{C-C})$<br>$\nu(\text{C-N})$ ,<br>$\omega(\text{HNH})$ ,<br>$\omega(\text{HCH})$ ,<br>$\rho(\text{HNH})$ |
| 940                  | 982  | 935                  | 933  | 959                 | 957  | 952                  | complex<br>atomic<br>displacements<br>$\nu(\text{C-C})$                                                                                                  |

| PDAPbCl <sub>4</sub>    |      | PDAPbBr <sub>4</sub> |      | PDAPbI <sub>4</sub> |      |                      | Assignment                                                                                                                |
|-------------------------|------|----------------------|------|---------------------|------|----------------------|---------------------------------------------------------------------------------------------------------------------------|
| Raman                   | FTIR | Raman                | FTIR | Raman               | FTIR | FTIR<br>(calculated) |                                                                                                                           |
|                         |      |                      |      |                     |      |                      | $\nu(\text{C-N})$ ,<br>$\tau(\text{CH}_2)$<br>$\rho(\text{HNH})$<br>$\tau(\text{HNH})$                                    |
| 833                     | 832  | 893                  | n/o  | 857                 | 857  | 847                  | complex<br>atomic<br>displacements<br>$\nu(\text{C-C})$<br>$\nu(\text{C-N})$<br>$\rho(\text{CH}_2)$<br>$\rho(\text{HNH})$ |
| 509<br>540              |      | 510                  |      | 531                 |      |                      | predominantly<br>$\delta(\text{CCC})$<br>$\rho(\text{HNH})$                                                               |
| 417                     |      | 428                  |      | 421                 |      |                      | predominantly<br>$\delta(\text{NCC})$                                                                                     |
| 327                     |      | 330                  |      | 320                 |      |                      | tors(HNCC)<br>$\delta(\text{NCC})$<br>tors(HCCC)                                                                          |
| 297                     |      | 289                  |      | 286                 |      |                      | tors(HNCC)                                                                                                                |
| 98<br>132<br>156<br>178 |      | 91<br>112            |      | 98                  |      |                      | lattice modes                                                                                                             |

\* The  $\nu$ ,  $\delta$ ,  $\rho$ ,  $w$ , and  $\tau$  notations denote stretching, bending (scissoring), rocking, wagging, and twisting vibrations, respectively.

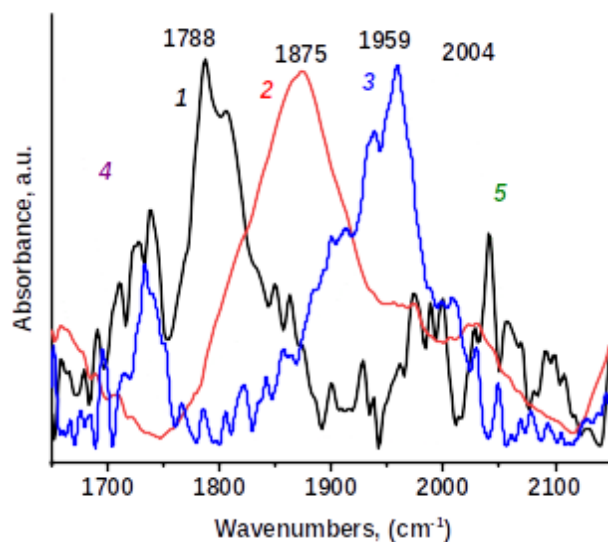

Figure S4. Normalized FTIR spectra in the range of  $(\text{tor}(\text{C-C-N})+\text{as}(\text{NH}))$  combination band: 1 – PDAPbI<sub>4</sub>, 2 – PDAPbBr<sub>4</sub>, 3 – PDAPbCl<sub>4</sub>. Spectra of solid PDA (4) and PDA dihydrochloride (5) diluted in KBr pellets are presented for comparison [32].

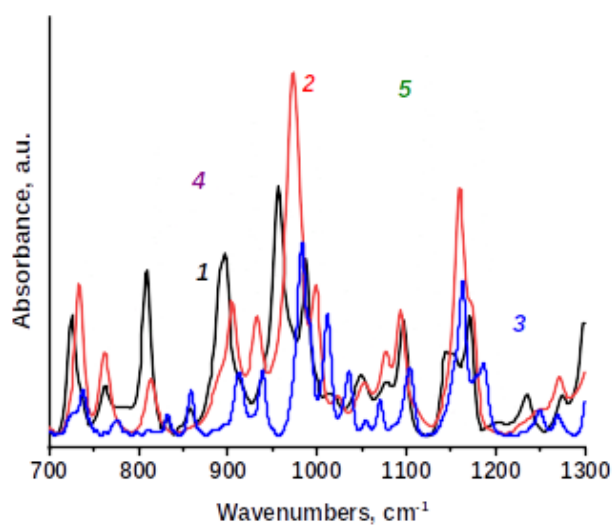

Figure S5. Normalized FTIR spectra in the (NH) frequency range: 1 – PDAPbI<sub>4</sub>, 2 – PDAPbBr<sub>4</sub>, 3 – PDAPbCl<sub>4</sub>. Spectra of solid PDA (4) and PDA dihydrochloride (5) diluted in KBr pellets are presented for comparison [32].

Luminescence lifetimes of the synthesized perovskites were determined using the setup in Figure S6. Working characteristics of the laser excitation source YAG laser Q-Smart 850 (Quantel, France): pulse repetition frequency was set to 10 Hz (minimal possible value); pulse energy at 355 nm –  $\leq 230$  mJ, pulse energy at 266 nm –  $\leq 100$  mJ; pulse duration 5 ns. The vacuumized sample was placed in the optical nitrogen cryostat LN-121-SPECTR (Cryotrade engineering, Russia). To record the time dependence of the luminescence intensity, a spectrometer was used as part of the spectrograph SP2500 (Princeton Instruments, USA) and CCD-camera with stroboscopic brightness enhancement and time delay generator (minimal exposition 0.1 ns) PicoStar HR (LaVision GmbH, Germany).

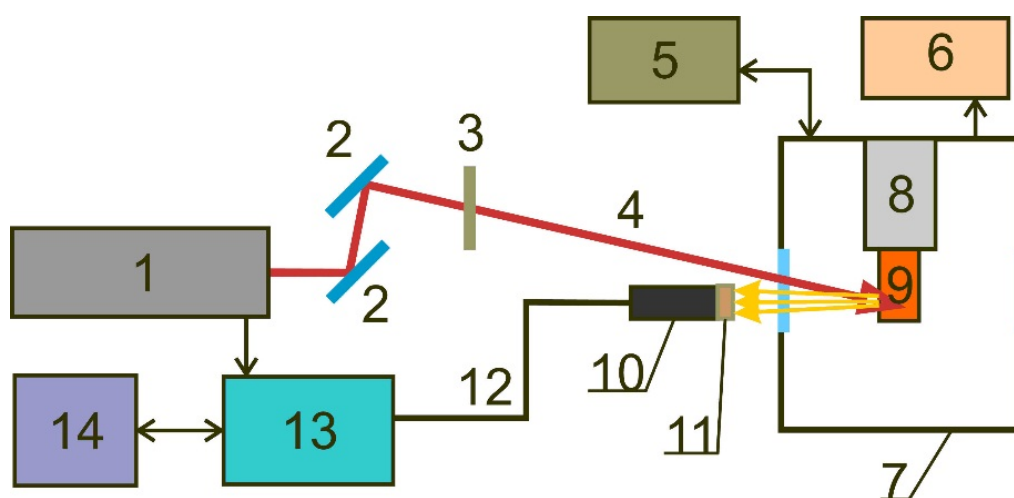

Figure S6. Experimental setup for luminescence spectra recording: 1 — Laser; 2 — Mirror; 3 — Filter UFS-1; 4 — Laser beam; 5 — Thermoregulator; 6 — Vacuum pump; 7 — Cryostat; 8 — Liquid nitrogen; 9 — Sample; 10 — Receiving collimator; 11 — Laser radiation suppression filter; 12 — Optical fiber; 13 — Spectrometer; 14 — Computer.

The studied luminescence was collected using a quartz collimator UV-74 (Ocean Optics, CIIA) and then transmitted via optical fiber into the receiver. Both, the laser excitation and luminescence feedback have used the same cryostat window, therefore, to prevent the reflected laser beam entering the collimator aperture the laser beam and collimator optical axis were shifted and tilted away from the window central normal by  $10^\circ$  — the laser beam - vertically, the collimator axis -

horizontally. To suppress the scattered laser radiation a filter was setup in front of the collimator: in the case of 266 nm light – a glass filter BC-4 (analogous to Schott N-WG295, Germany), in the case of 355 nm – a dichroic filter LP02-355RU-25 (Semrock, USA). The remnant second harmonics laser radiation (532 nm) was suppressed by means of the filter VΦC-1 (analogous to Schott UG-1, Germany).

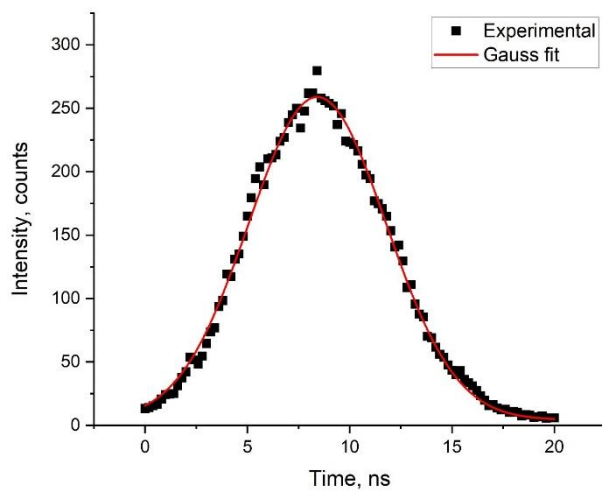

Figure S7. Profile of increasing and decreasing laser pulse intensity for luminescence excitation.
